# Supplementary material
Source: PubMed Central journal article supplement (PMC2375505)
Supplement: jphysiol_2007.142307_1.pdf [file jphysiol_2007.142307_1.pdf]

Supplementary Fig.1 For publication

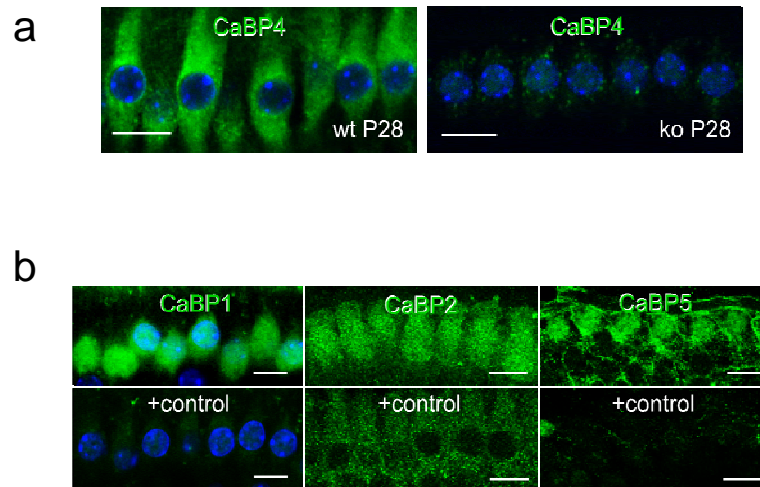

- a) Localization of CaBP4 in P28 IHCs. Whole-mount organ of Corti from wild-type (WT) and CaBP4<sup>-/-</sup> (ko) mice were processed for immunolabeling with CaBP4 antibodies (green) and Hoechst (blue).
- b) Characterization of CaBP antibody specificity for immunostaining in whole-mount mouse Organ of Corti. Confocal micrographs showing immunostaining with CaBP1, CaBP2, and CaBP5 (green, top panels) using FITC secondary reagents. Bottom panels show reduced signal upon preadsorption of antibodies with immunogen.
